# Supplementary material
Source: PubMed Central journal article supplement (PMC7959950)
Supplement: 15-00474.pdf [file 15-00474.pdf]

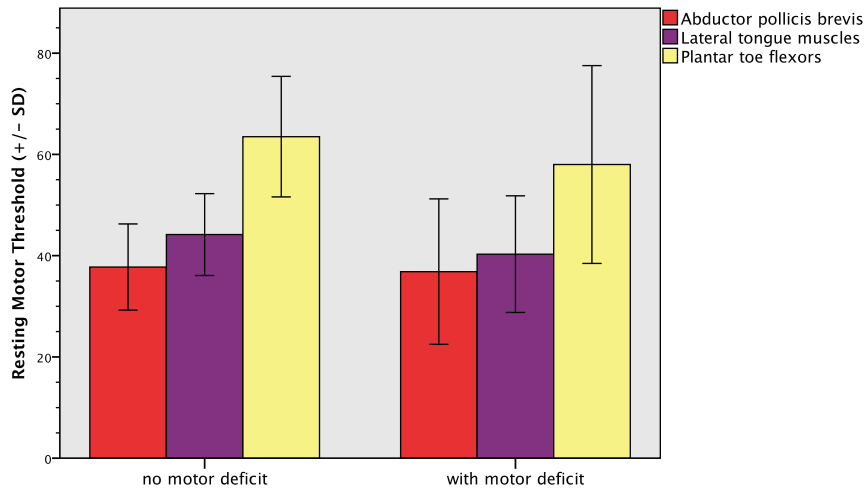

**ON-LINE FIG 1.** The mean resting motor threshold of the hand (abductor pollicis brevis:  $36.8 \pm 14.4$  U), foot (plantaris toe flexors:  $58.0 \pm 19.5$  U), and face representation (lateral tongue muscles:  $40.3 \pm 11.5$  U) of the patients with motor impairment does not differ from that in patients without motor deficits (hand:  $37.8 \pm 8.5$  U; foot:  $63.5 \pm 11.9$  U; face:  $44.2 \pm 8.1$  U;  $P > .1$ ).

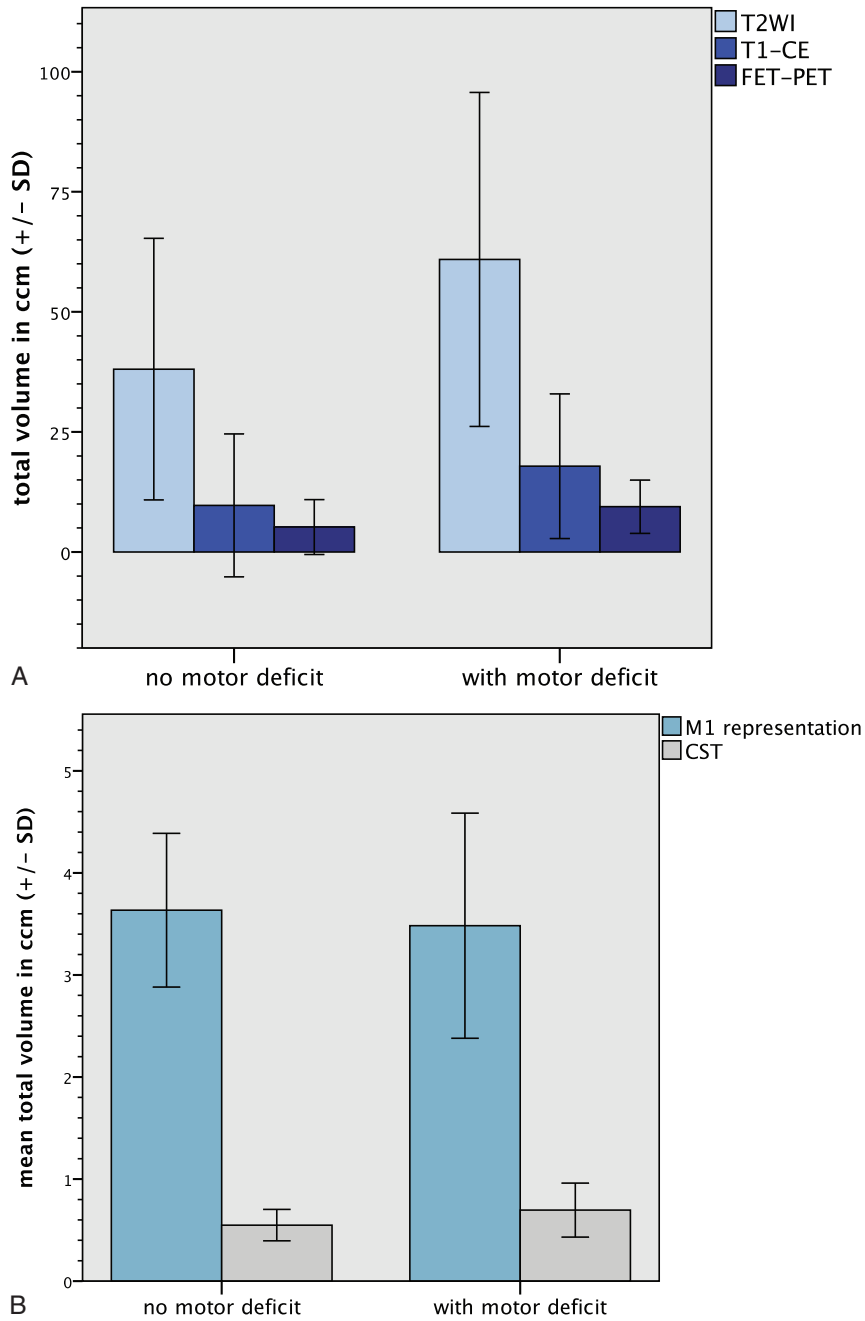

**ON-LINE FIG 2.** A, The total tumor size based on the T1-CE or FET-PET lesion volumes does not differ between the patients with and without motor deficits ( $P > .1$ ). A statistical trend of the total peritumoral T2WI lesion being greater in the impaired patients compared with the others ( $P = .08$ ) was noted. B, The mean size of the cortical M1 representations and the CST is not significantly different between the 2 groups ( $P > .1$ ).

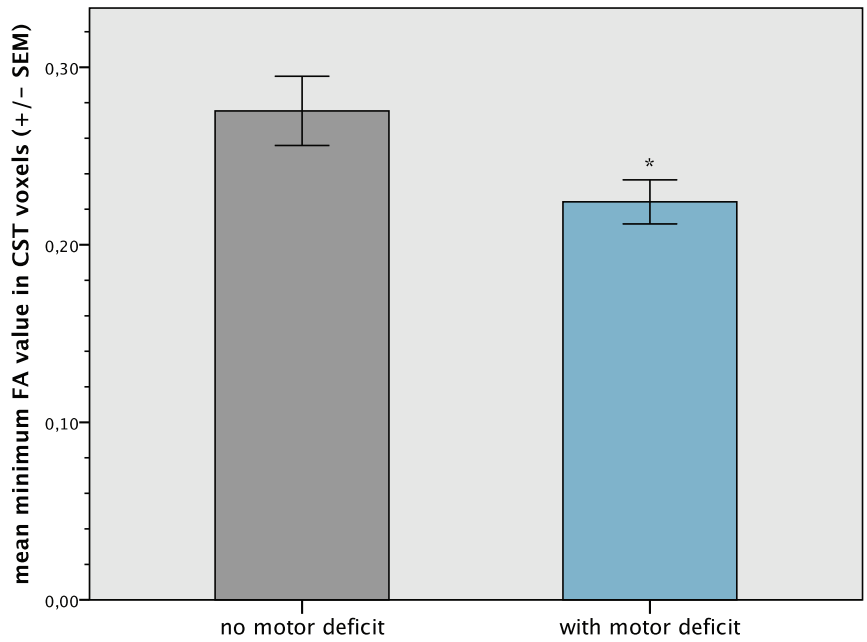

**ON-LINE FIG 3.** The mean minimum FA value in the voxels of the CST is significantly lower in the group of patients with a primary motor deficit than in those with preserved function. The asterisk indicates  $P < .05$ .

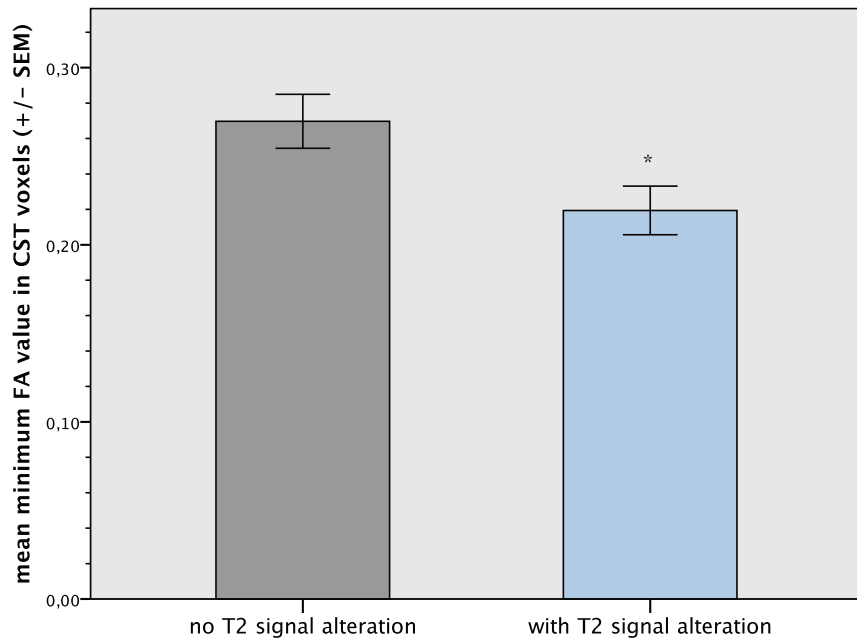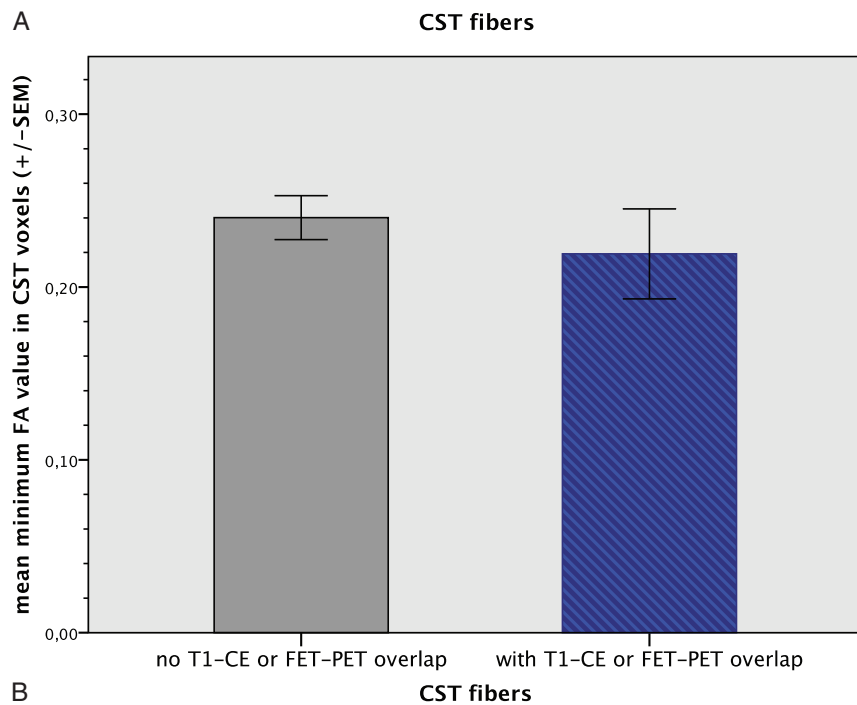

**ON-LINE FIG 4.** A, Besides the clinical motor function, the FA values of the CST affected by altered T2WI signal overlap ( $0.22 \pm 0.06$  U,  $n = 19$ ) are significantly lower than those of the unaffected ones ( $0.27 \pm 0.05$  U,  $n = 11$ ). The asterisk indicates  $P = .02$ . B, There is no difference detected in the FA values of motor fibers infiltrated by the T1-CE or FET-PET lesion ( $0.22 \pm 0.06$  U,  $n = 7$ ) compared with the unaffected fibers ( $0.24 \pm 0.06$  U,  $n = 23$ ,  $P > .1$ ).

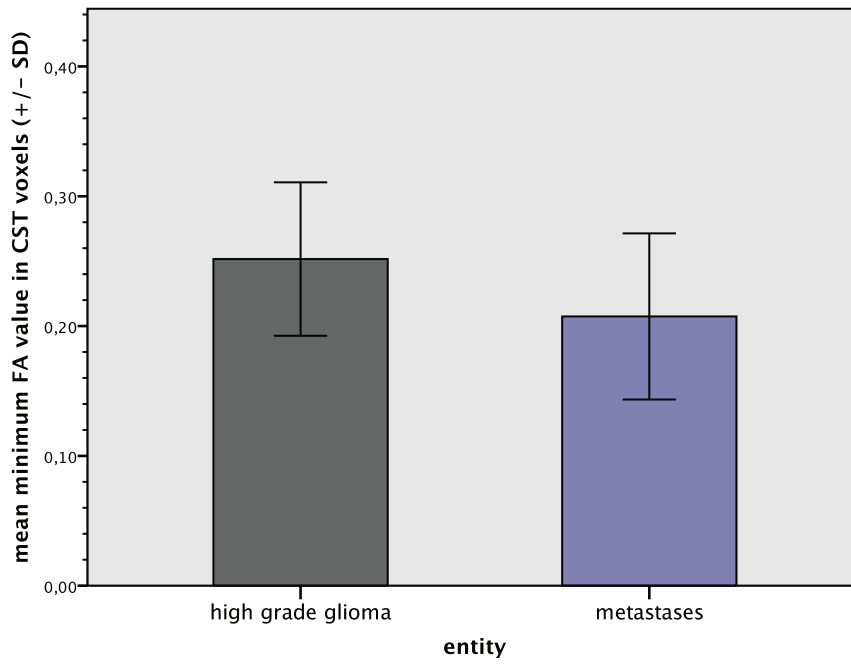

**ON-LINE FIG 5.** With regard to the tumor entity, there was no statistical difference detected in the mean FA values of the CST of patients with a high-grade glial ( $n = 21$ ) versus a metastatic lesion ( $n = 7$ ) ( $P > .1$ ).

**On-line Table 1: Clinical characteristics**

| Pt. No. | Sex | Age (yr) | Brain Tumor Location (L/R) | Histopathologic Diagnosis, WHO Grade | Initial Primary Motor Deficit | KPS at Admission (%) | Motor Deficit Post-Surgery <sup>a</sup> | Gross Total Tumor Resection Achieved | KPS at Discharge (%) | Steroid Therapy Preoperatively | Epilepsy, Anticonvulsive Therapy |
|---------|-----|----------|----------------------------|--------------------------------------|-------------------------------|----------------------|-----------------------------------------|--------------------------------------|----------------------|--------------------------------|----------------------------------|
| 1       | M   | 48       | Frontotemporal, L          | GBM, IV (rec)                        | None                          | 100                  | →                                       | Yes                                  | 100                  | No                             | Yes, yes                         |
| 2       | M   | 77       | Postcentral, R             | Metastasis                           | None                          | 90                   | →                                       | No                                   | 80                   | Yes                            | No, no                           |
| 3       | F   | 33       | Frontotemporal, L          | GBM, IV                              | None                          | 90                   | →                                       | Yes                                  | 90                   | Yes                            | Yes, yes                         |
| 4       | M   | 56       | Precentral, L              | Anaplastic astrocytoma, III          | None                          | 100                  | →                                       | Yes                                  | 90                   | Yes                            | Yes, yes                         |
| 5       | M   | 51       | Postcentral, L             | GBM, IV                              | None                          | 100                  | →                                       | Yes                                  | 100                  | Yes                            | No, no                           |
| 6       | F   | 66       | Postcentral, L             | GBM, IV                              | None                          | 70                   | →                                       | No                                   | 60                   | Yes                            | No, no                           |
| 7       | M   | 47       | Frontal, R                 | Anaplastic astrocytoma, III          | None                          | 100                  | →                                       | No                                   | 80                   | No                             | Yes, yes                         |
| 8       | F   | 28       | Postcentral, R             | Metastasis                           | None                          | 90                   | →                                       | No                                   | 90                   | Yes                            | No, no                           |
| 9       | F   | 76       | Precentral, R              | Metastasis                           | Upper limb                    | 70                   | ↓                                       | Yes                                  | 50                   | Yes                            | Yes, yes                         |
| 10      | M   | 79       | Frontal, R                 | GBM, IV                              | Hemiparesis                   | 80                   | ↑                                       | Yes                                  | 80                   | Yes                            | No, no                           |
| 11      | F   | 43       | Frontotemporal, L          | GBM, IV                              | Hemiparesis                   | 80                   | ↑                                       | No                                   | 80                   | Yes                            | Yes, yes                         |
| 12      | F   | 70       | Occipital ventricle, L     | Anaplastic ependymoma, III (rec)     | Hemiparesis                   | 70                   | ↑                                       | Yes                                  | 80                   | Yes                            | No, no                           |
| 13      | M   | 77       | Temporoparietal, R         | GBM, IV                              | Hemiparesis                   | 80                   | →                                       | No                                   | 60                   | Yes                            | Yes, yes                         |
| 14      | F   | 72       | Postcentral, L             | GBM, IV                              | Hemiparesis                   | 70                   | ↑                                       | No                                   | 80                   | Yes                            | No, no                           |
| 15      | M   | 60       | Precentral, L              | GBM, IV                              | Hemiparesis                   | 80                   | ↑                                       | No                                   | 90                   | Yes                            | No, no                           |
| 16      | M   | 60       | Precentral, L              | GBM, IV                              | Facial                        | 100                  | →                                       | No                                   | 100                  | No                             | Yes, yes                         |
| 17      | M   | 72       | Central, R                 | Metastasis                           | Upper limb                    | 80                   | ↑                                       | No                                   | 80                   | No                             | Yes, yes                         |
| 18      | M   | 68       | Precentral, L              | GBM, IV                              | Facial                        | 90                   | ↓                                       | No                                   | 80                   | Yes                            | No, no                           |
| 19      | M   | 46       | Central, R                 | GBM, IV (rec)                        | Facial                        | 90                   | →                                       | Yes                                  | 100                  | Yes                            | Yes, yes                         |
| 20      | F   | 65       | Precentral, L              | Metastasis                           | Hemiparesis                   | 90                   | ↑                                       | Yes                                  | 90                   | Yes                            | No, no                           |
| 21      | F   | 74       | Central, L                 | GBM, IV                              | Upper limb                    | 90                   | ↑                                       | Yes                                  | 100                  | Yes                            | No, no                           |
| 22      | F   | 69       | Precentral, L              | GBM, IV (rec)                        | Upper limb                    | 100                  | ↓                                       | No                                   | 80                   | Yes                            | No, no                           |
| 23      | M   | 65       | Precentral, R              | GBM, IV                              | Hemiparesis                   | 90                   | ↑                                       | Yes                                  | 90                   | Yes                            | Yes, yes                         |
| 24      | F   | 64       | Precentral, R              | Lymphoma <sup>b</sup>                | Hemiparesis                   | 80                   | ↑                                       | Yes                                  | 80                   | No                             | No, no                           |
| 25      | F   | 63       | Frontal, R                 | GBM, IV                              | Hemiparesis                   | 70                   | N.O.                                    | N.O.                                 | 70                   | Yes                            | No, no                           |
| 26      | M   | 69       | Postcentral, L             | GBM, IV                              | Hemiparesis                   | 90                   | →                                       | Yes                                  | 80                   | No                             | No, no                           |
| 27      | M   | 54       | Precentral, L              | GBM, IV                              | Upper limb                    | 90                   | ↑                                       | Yes                                  | 90                   | Yes                            | No, no                           |
| 28      | F   | 51       | Postcentral, L             | GBM, IV                              | Hemiparesis                   | 90                   | ↑                                       | Yes                                  | 90                   | Yes                            | Yes, yes                         |
| 29      | F   | 58       | Central, R                 | Metastasis                           | Hemiparesis                   | 90                   | ↑                                       | No                                   | 90                   | Yes                            | Yes, yes                         |
| 30      | M   | 46       | Precentral, R              | Metastasis (rec)                     | Facial                        | 90                   | ↓                                       | Yes                                  | 90                   | Yes                            | Yes, yes                         |

**Note:**—WHO indicates World Health Organization; Pt., patient; KPS, Karnofsky Performance Scale; GBM, glioblastoma multiforme; L, Left; R, right; N.O., not operated; rec, recurrent disease; ↑, improved; →, unchanged; ↓, deteriorated.

<sup>a</sup> At discharge.

<sup>b</sup> Atypical appearance on preoperative diagnostics and inconclusive intraoperative pathologic report led to the unusual aim of gross total tumor resection.

**On-line Table 2: Inclusion and exclusion study criteria**

| Inclusion Criteria                                                                | Exclusion Criteria               |
|-----------------------------------------------------------------------------------|----------------------------------|
| 18–79 Years of age                                                                | Therapy-resistant epilepsy       |
| Sufficient contractual capability                                                 | Pregnancy                        |
| Space-occupying lesion of suspicious malignancy close to the MI region or the CST | Severe psychiatric disorders     |
|                                                                                   | Karnofsky Performance Scale <70% |
|                                                                                   | Pre-existing motor deficits      |
|                                                                                   | Contraindications to MRI         |

**On-line Table 3. Hybrid MRI-PET and nTMS protocol**

| No.                         | Sequence                                                                          | Characteristics                                                                                                                                                                                                                                                     | Acquisition Time (min:sec) |
|-----------------------------|-----------------------------------------------------------------------------------|---------------------------------------------------------------------------------------------------------------------------------------------------------------------------------------------------------------------------------------------------------------------|----------------------------|
| Hybrid MRI-PET              |                                                                                   |                                                                                                                                                                                                                                                                     |                            |
| 1                           | Localizer                                                                         |                                                                                                                                                                                                                                                                     | 00:27                      |
| 2                           | T1-MPRAGE                                                                         | TE = 3.93 ms, TR = 2.250 ms, TI = 900 ms, 192 sagittal sections, matrix size = 256 × 256 × 192                                                                                                                                                                      | 04:40                      |
| 3                           | T2-SPACE                                                                          | TR = 5000 ms, TE = 453 ms, FOV = 256 mm, 176 sagittal sections, voxel size = 1.0 × 1.0 × 1.0 mm <sup>3</sup>                                                                                                                                                        | 09:40                      |
| 4                           | DTI                                                                               | TE = 81 ms, TR = 7000 ms, matrix size = 112 × 112, 62 sections with a voxel size of 2.0 × 2.0 × 2.0 mm <sup>3</sup> , 30 diffusion gradient directions, b-value of 800 and a single acquisition with a b-value of 0                                                 | 07:09                      |
| 5                           | T1-CE-MPRAGE                                                                      | TE = 3.93 ms, TR = 2.250 ms, TI = 900 ms, 192 sagittal sections, matrix size = 256 × 256 × 192, after intravenous injection of 0.3 mmol/kg body weight of Dotarem                                                                                                   | 04:40                      |
| 6                           | FET-PET                                                                           | Hybrid acquisition technique: 16-frame total after the injection of 200 mBq of FET: 10 × 1-minute frame intervals at the beginning and 6 × 5-minute frames at the end                                                                                               | 40:00                      |
| Subtotal hybrid MR-PET nTMS |                                                                                   |                                                                                                                                                                                                                                                                     | 40–50 min                  |
| 1                           | Coregistration                                                                    | Neuronavigational SPACE sequence coregistration with a maximum error of 2 mm                                                                                                                                                                                        | 01:00                      |
| 2                           | Resting motor threshold determination for the hand, foot, and face representation | Motor-evoked potentials of the abductor pollicis brevis muscle (latency range, 17–27 ms), the plantar toe flexors (latency range, 34–50 ms), and the anterior lateral tongue muscles (latency range, 7–15 ms) using surface electrodes were recorded                | 09:00                      |
| 3                           | Motor mapping                                                                     | 110% Stimulation intensity of the respective resting motor threshold; for each muscle representation, 150–250 pulses (depending on the size) on the cortical surface representation of the lesional hemisphere (grid node space: 5 mm, 2–3 pulses per grid section) | 30:00                      |
| Subtotal nTMS               |                                                                                   |                                                                                                                                                                                                                                                                     | 40–60 min                  |
| Total MRI/PET/nTMS          |                                                                                   |                                                                                                                                                                                                                                                                     | 80–110 min                 |

**On-line Table 4: Contingency table of the overlap of functional tissue with T1-CE lesion signal and FET-PET, respectively, in relation to the presence of a motor deficit before the operation<sup>a</sup>**

|                                        |                                           | Motor Deficit |            | Total      |
|----------------------------------------|-------------------------------------------|---------------|------------|------------|
|                                        |                                           | No            | Yes        |            |
| Functional T1-CE/FET-PET overlap<br>No | T1-CE-PET, <i>n</i>                       | 7/8           | 11/7       | 18/15      |
|                                        | % Within functional T1-CE/FET-PET overlap | 38.9/53.3%    | 61.1/46.7% | 100/100%   |
|                                        | % Within motor deficit                    | 87.5/100%     | 50.0/36.8% | 60.0/55.6% |
| Yes                                    | T1-CE/FET-PET, <i>n</i>                   | 1/0           | 11/12      | 12/12      |
|                                        | % Within functional T1-CE/FET-PET overlap | 8.3/0.0%      | 91.7/100%  | 100/100%   |
|                                        | % Within motor deficit                    | 12.5/0.0%     | 50.0/63.2% | 40.0/44.4% |
| Total                                  | T1-CE/FET-PET, <i>n</i>                   | 8/8           | 22/19      | 30/27      |
|                                        | Percentage of total                       | 26.7/29.6%    | 73.3/70.4% | 100/100%   |

<sup>a</sup> Two-tailed Fisher exact test: functional T1-CE overlap: *P* = .099; functional PET overlap: *P* < .01.

**On-line Table 5: Contingency table of the overlap of functional tissue with T1-CE lesion signal and FET-PET, respectively, on presurgical maps in relation to motor function after the operation<sup>a</sup>**

|                                        |                                           | Motor Function        |              | Total      |
|----------------------------------------|-------------------------------------------|-----------------------|--------------|------------|
|                                        |                                           | Unchanged or Improved | Deteriorated |            |
| Functional T1-CE/FET-PET overlap<br>No | T1-CE/FET-PET, <i>n</i>                   | 17/15                 | 0/0          | 17/15      |
|                                        | % Within functional T1-CE/FET-PET overlap | 100/100%              | 0/0%         | 100/100%   |
|                                        | % Within motor function                   | 68.0/65.2%            | 0/0%         | 58.6/55.6% |
| Yes                                    | T1-CE/FET-PET, <i>n</i>                   | 8/8                   | 4/4          | 12/12      |
|                                        | % Within functional T1-CE/FET-PET overlap | 66.7/66.7%            | 33.3/33.3%   | 100/100%   |
|                                        | % Within motor function                   | 32.0/34.8%            | 100/100%     | 41.4/44.4% |
| Total                                  | T1-CE/FET-PET, <i>n</i>                   | 25/23                 | 4/4          | 29/27      |
|                                        | Percentage of total                       | 86.2/85.2%            | 13.8/14.8%   | 100/100%   |

<sup>a</sup> Two-tailed Fisher exact test: functional T1-CE overlap, *P* < .05; functional/PET overlap, *P* < .05.

**On-line Table 6: Contingency table of the overlap of functional tissue with the T2WI lesion in relation to the presence of a motor deficit before the operation**

|                                                                             |                                  | Motor Deficit |            |            |
|-----------------------------------------------------------------------------|----------------------------------|---------------|------------|------------|
|                                                                             |                                  | No            | Yes        | Total      |
| In total <sup>a</sup>                                                       |                                  |               |            |            |
| Functional T2WI overlap                                                     |                                  |               |            |            |
| No                                                                          | <i>n</i>                         | 6             | 1          | 7          |
|                                                                             | % Within functional/T2WI overlap | 85.7%         | 14.3%      | 100%       |
|                                                                             | % Within motor deficit           | 75.0%         | 4.5%       | 23.3%      |
| Yes                                                                         | <i>n</i>                         | 2             | 21         | 23         |
|                                                                             | % Within functional/T2WI overlap | 8.7%          | 91.3%      | 100%       |
|                                                                             | % Within motor deficit           | 25.0%         | 95.5%      | 76.7%      |
| Total                                                                       | <i>n</i>                         | 8             | 22         | 30         |
|                                                                             | Percentage of total              | 26.7%         | 73.3%      | 100%       |
| With respect to tumor entity (metastases vs high-grade glioma) <sup>b</sup> |                                  |               |            |            |
| Functional T2WI overlap                                                     |                                  |               |            |            |
| No                                                                          | Metastases/gliomas, <i>n</i>     | 1/5           | 0/1        | 1/6        |
|                                                                             | % Within functional/T2WI overlap | 100/83.3%     | 0/16.7%    | 100/100%   |
|                                                                             | % Within motor deficit           | 50.0/83.3%    | 0/6.7%     | 14.3/28.6% |
| Yes                                                                         | Metastases/gliomas, <i>n</i>     | 1/1           | 5/14       | 6/15       |
|                                                                             | % Within functional/T2WI overlap | 16.7/6.7%     | 83.3/93.3% | 100/100%   |
|                                                                             | % Within motor deficit           | 50.0/16.7%    | 100/93.3%  | 85.7/71.4% |
| Total                                                                       | Metastases/gliomas, <i>n</i>     | 2/6           | 5/15       | 7/21       |
|                                                                             | Percentage of total              | 28.6/28.6%    | 71.4/71.4% | 100/100%   |

<sup>a</sup> Two-tailed Fisher exact test:  $P < .001$ .

<sup>b</sup> Two-tailed Fisher exact test: metastases,  $P = .29$ ; high grade gliomas,  $P < .01$ .

**On-line Table 7: Contingency table of the overlap of functional tissue with the T2WI lesion on presurgical maps in relation to motor function recovery after the operation in patients with motor impairment<sup>a</sup>**

| Functional T2WI Overlap |                                  | Motor Function            |          | Total |
|-------------------------|----------------------------------|---------------------------|----------|-------|
|                         |                                  | Unchanged or Deteriorated | Improved |       |
| No                      | <i>n</i>                         | 6                         | 6        | 12    |
|                         | % Within functional T2WI overlap | 50.0%                     | 50.0%    | 100%  |
|                         | % Within motor function          | 85.7%                     | 46.2%    | 60.0% |
| Yes                     | <i>n</i>                         | 1                         | 7        | 8     |
|                         | % Within functional T2WI overlap | 12.5%                     | 87.5%    | 100%  |
|                         | % Within motor function          | 14.3%                     | 53.8%    | 40.0% |
| Total                   | <i>n</i>                         | 7                         | 13       | 20    |
|                         | Percentage of total              | 35.0%                     | 65.0%    | 100%  |

<sup>a</sup> Two-tailed Fisher exact test:  $P = .16$ .
